# Supplementary material
Source: Elsevier journal article supplement (https://www.sciencedirect.com/science/article/pii/S1575181318300937)
Supplement: mmc1 [file S1575181318300937:mmc1.pdf]

## ANEXO

## CORE COMPETENCIES FOR PUBLIC HEALTH PROFESSIONALS (CCPHP)

**Instrucciones.** Lea cada declaración de competencia enumerada dentro de los dominios. En cada dominio, y para cada declaración de competencia, piense el nivel donde usted está actualmente en condiciones de realizar la habilidad. Entonces, califique su nivel de competencia en cada una: 1) “Ninguna”, no tiene conocimiento o tiene muy poco sobre esa habilidad, 2) “Consistente”, ha oído hablar, pero tiene un conocimiento y habilidad limitado para aplicarlo, 3) “Conocedor”, se siente cómo con su conocimiento y capacidad para aplicar la habilidad, y 4) “Competente”, se siente muy cómodo, es un experto, podría enseñar esa habilidad a los demás. Una vez registradas sus respuestas para cada competencia, sume su puntuación y colóquela en la columna “puntuación”, y posteriormente, obtenga la media y colóquela en la columna “promedio”. Finalmente, revise sus resultados y siga la orientación que se ofrece en la sección “interpretación de resultados” para determinar sus próximos pasos a seguir para mejorar su competencia.

**Dominio 1. Habilidades de evaluación/Analítica**

| <i>Hasta qué punto es usted capaz de...</i> |                                                                                                                                                                                                                                                                                                 |  |
|---------------------------------------------|-------------------------------------------------------------------------------------------------------------------------------------------------------------------------------------------------------------------------------------------------------------------------------------------------|--|
| <b>1</b>                                    | Describir los factores que afectan la salud de una comunidad (por ejemplo, equidad, ingresos, educación, medio ambiente).                                                                                                                                                                       |  |
| <b>2</b>                                    | Determinar los datos e información cuantitativa y cualitativa necesarios para evaluar la salud de una comunidad (por ejemplo, estadísticas vitales, registros electrónicos de salud, patrones de transporte, tasas de desempleo, aportes de la comunidad, evaluaciones sobre equidad en salud). |  |
| <b>3</b>                                    | Asegurar que los principios éticos se aplican en el acceso, recopilación, análisis, manejo, mantenimiento y difusión de datos e información.                                                                                                                                                    |  |
| <b>4</b>                                    | Utilizar tecnologías de información en el acceso, recopilación, análisis, manejo, mantenimiento y difusión de datos e información.                                                                                                                                                              |  |
| <b>5</b>                                    | Evaluar la validez y confiabilidad de los datos.                                                                                                                                                                                                                                                |  |
| <b>6</b>                                    | Evaluar la comparabilidad de los datos (por ejemplo, datos del mismo año ajustado por edad, variables en conjunto que tienen definiciones similares).                                                                                                                                           |  |
| <b>7</b>                                    | Resolver las brechas en los datos proporcionados.                                                                                                                                                                                                                                               |  |
| <b>8</b>                                    | Asegurar que la recolección de datos cuantitativos y cualitativos es válida y confiable.                                                                                                                                                                                                        |  |
| <b>9</b>                                    | Determinar las tendencias de los datos cuantitativos y cualitativos.                                                                                                                                                                                                                            |  |
| <b>10</b>                                   | Integrar los resultados de los datos cuantitativos y cualitativos en los planes de organización y operación (por ejemplo, en el plan estratégico, plan de mejora de la calidad o en el desarrollo profesional).                                                                                 |  |
| <b>11</b>                                   | Evaluar los bienes y recursos que se pueden utilizar para mejorar la salud de una comunidad (por ejemplo, clubs nocturnos, bibliotecas públicas, hospitales, organizaciones religiosas, instituciones académicas, programas de becas).                                                          |  |
| <b>12</b>                                   | Determinar el estado de salud de la comunidad y los factores que influyen (por ejemplo, la calidad, disponibilidad, accesibilidad, la utilización de los servicios de salud y el acceso a una vivienda).                                                                                        |  |

| <i>Hasta qué punto es usted capaz de...</i> |                                                                                                                                                                                                                    |  |
|---------------------------------------------|--------------------------------------------------------------------------------------------------------------------------------------------------------------------------------------------------------------------|--|
| <b>13</b>                                   | Asegurar el desarrollo de evaluaciones en la comunidad en materia de salud, utilizando la información sobre el estado de salud, factores que influyen, y recursos disponibles.                                     |  |
| <b>14</b>                                   | Tomar decisiones basadas en la evidencia (por ejemplo, la determinación de los programas de investigación, el uso de las recomendaciones de las guías sobre la comunidad en los servicios de salud).               |  |
| <b>15</b>                                   | Abogar por el uso de evidencia en la toma de decisiones que afecta a la salud de una comunidad (por ejemplo, ayudar a los funcionarios electos a entender las necesidades de salud y el impacto de los programas). |  |
| Puntuación                                  |                                                                                                                                                                                                                    |  |
| Promedio                                    |                                                                                                                                                                                                                    |  |

## **Dominio 2. Política de desarrollo/Programa de habilidades de planeación**

| <i>Hasta qué punto es usted capaz de...</i> |                                                                                                                                                                                                                                                                                                                                |  |
|---------------------------------------------|--------------------------------------------------------------------------------------------------------------------------------------------------------------------------------------------------------------------------------------------------------------------------------------------------------------------------------|--|
| <b>1</b>                                    | Asegurar el desarrollo de un plan de mejora en salud nacional/estatal/comunitario (por ejemplo, la descripción de resultados, determinar cambios necesarios en política, identifica las partes responsables para la implementación).                                                                                           |  |
| <b>2</b>                                    | Desarrollar metas y objetivos organizacionales.                                                                                                                                                                                                                                                                                |  |
| <b>3</b>                                    | Desarrollar un plan estratégico organizacional (por ejemplo, incluir objetivos y metas mensurables, incorpora un plan comunitario para la mejora de salud o un plan de desarrollo para la fuerza laboral, un plan de mejora de la calidad) con el aporte de parte del gobierno o administración que supervisa la organización. |  |
| <b>4</b>                                    | Monitorear la implementación del plan estratégico organizacional.                                                                                                                                                                                                                                                              |  |
| <b>5</b>                                    | Integrar las tendencias actuales y proyectadas (por ejemplo, salud, economía, social, políticas, medio ambiente) dentro de la planificación estratégica de la organización.                                                                                                                                                    |  |
| <b>6</b>                                    | Seleccionar las opciones de políticas, programas y servicios para una mayor exploración (por ejemplo, las políticas de uso de datos, las políticas de recursos humanos, programas de vacunación, programas de seguridad alimentaria).                                                                                          |  |
| <b>7</b>                                    | Determinar la factibilidad (por ejemplo, social, político, legal, geográfica) y las implicaciones de las políticas, programas y servicios.                                                                                                                                                                                     |  |
| <b>8</b>                                    | Seleccionar las políticas, programas y servicios para la implementación.                                                                                                                                                                                                                                                       |  |
| <b>9</b>                                    | Asegurar que la implementación de políticas, programas y servicios es consistente con las leyes y reglamentos.                                                                                                                                                                                                                 |  |
| <b>10</b>                                   | Influir en las políticas, programas y servicios externos de la organización que afectan la salud de la comunidad (por ejemplo, la zonificación, transporte, fumigaciones).                                                                                                                                                     |  |
| <b>11</b>                                   | Explicar la importancia de las evaluaciones para la mejora de las políticas, programas y servicios.                                                                                                                                                                                                                            |  |
| <b>12</b>                                   | Asegurar la evaluación de las políticas, programas y servicios (por ejemplo, productos, resultados, procesos, procedimientos, inversiones).                                                                                                                                                                                    |  |
| <b>13</b>                                   | Desarrolla estrategias para la mejora continua de la calidad.                                                                                                                                                                                                                                                                  |  |

| <i>Hasta qué punto es usted capaz de...</i> |                                                                                                                                                                                                                                                                                                            |  |
|---------------------------------------------|------------------------------------------------------------------------------------------------------------------------------------------------------------------------------------------------------------------------------------------------------------------------------------------------------------|--|
| <b>14</b>                                   | Evaluar la aplicación de la informática en salud pública en el desarrollo, implementación, evaluación y mejora de las políticas, programas y servicios (por ejemplo, los sistemas integrados de datos, información electrónica, sistemas de gestión del conocimiento, sistemas de información geográfica). |  |
| Puntuación                                  |                                                                                                                                                                                                                                                                                                            |  |
| Promedio                                    |                                                                                                                                                                                                                                                                                                            |  |

### **Dominio 3. Habilidades de comunicación**

| <i>Hasta qué punto es usted capaz de...</i> |                                                                                                                                                                                                                                                                                      |  |
|---------------------------------------------|--------------------------------------------------------------------------------------------------------------------------------------------------------------------------------------------------------------------------------------------------------------------------------------|--|
| <b>1</b>                                    | Asegurarse la alfabetización de la población atendida (por ejemplo, la capacidad de obtener, interpretar y utilizar la información en salud), reflejándose en las políticas, programas y servicios de la organización.                                                               |  |
| <b>2</b>                                    | Comunicar por escrito y oralmente con capacidad lingüística y cultural (por ejemplo, el uso de materiales adecuados a la edad o la incorporación de imágenes).                                                                                                                       |  |
| <b>3</b>                                    | Asegurarse de que la organización busca la entrada de otras organizaciones e individuos (por ejemplo, cámaras de comercio, religiones, escuelas, servicio social, hospitales, gobierno, organizaciones comunitarias, grupos de poblaciones) para la mejora de salud de la comunidad. |  |
| <b>4</b>                                    | Evaluar los enfoques para la difusión e información sobre los datos en salud pública (por ejemplo, redes sociales, periódicos, boletines, revistas, reuniones municipales, bibliotecas, reuniones vecinales).                                                                        |  |
| <b>5</b>                                    | Transmitir datos e información a profesionales y público general, utilizando una variedad de enfoques (por ejemplo, informes, presentaciones, correo electrónico, cartas, entrevistas de prensa).                                                                                    |  |
| <b>6</b>                                    | Evaluar las estrategias de comunicación de información para influir en el comportamiento y mejorar la salud (por ejemplo, utilizar métodos de mercado social, tomar en cuenta las teorías de comportamiento).                                                                        |  |
| <b>7</b>                                    | Facilitar la comunicación entre los individuos, grupos y organizaciones.                                                                                                                                                                                                             |  |
| <b>8</b>                                    | Comunicar las funciones de salud pública a nivel gubernamental, la atención y mejora de la salud.                                                                                                                                                                                    |  |
| Puntuación                                  |                                                                                                                                                                                                                                                                                      |  |
| Promedio                                    |                                                                                                                                                                                                                                                                                      |  |

### **Dominio 4. Habilidades de competencia cultural**

| <i>Hasta qué punto es usted capaz de...</i> |                                                                                                                                                                                                                                                              |  |
|---------------------------------------------|--------------------------------------------------------------------------------------------------------------------------------------------------------------------------------------------------------------------------------------------------------------|--|
| <b>1</b>                                    | Describir el concepto de diversidad en individuos y poblaciones (por ejemplo, lenguaje, cultura, valores, estatus socioeconómico, geografía, educación, raza, género, edad, etnia, orientación sexual, profesión, religión, capacidades físicas y mentales). |  |
| <b>2</b>                                    | Describir la diversidad de individuos y poblaciones en una comunidad.                                                                                                                                                                                        |  |
| <b>3</b>                                    | Reconocer las formas de diversidad que influye en las políticas, programas, servicios y salud de una comunidad.                                                                                                                                              |  |

|            |                                                                                                                                                          |  |
|------------|----------------------------------------------------------------------------------------------------------------------------------------------------------|--|
| 4          | Incorporar diversas perspectivas en el desarrollo, implementación y evaluación de políticas, programas y servicios que afecta la salud de una comunidad. |  |
| 5          | Abogar por la diversidad de individuos y poblaciones que se abordan en las políticas, programas y servicios que afectan la salud comunitaria.            |  |
| 6          | Evaluar los efectos de las políticas, programas y servicios en las diferentes poblaciones de una comunidad.                                              |  |
| 7          | Demostrar el valor de una diversa fuerza laboral de salud pública.                                                                                       |  |
| 8          | Tomar medidas para apoyar una diversa fuerza laboral en salud pública.                                                                                   |  |
| Puntuación |                                                                                                                                                          |  |
| Promedio   |                                                                                                                                                          |  |

### **Dominio 5. Dimensiones de la comunidad para la práctica de las habilidades**

| <i>Hasta qué punto es usted capaz de...</i> |                                                                                                                                                                                                                                        |  |
|---------------------------------------------|----------------------------------------------------------------------------------------------------------------------------------------------------------------------------------------------------------------------------------------|--|
| 1                                           | Evaluar las funciones y responsabilidades de las organizaciones no gubernamentales y gubernamentales en la prestación de programas y servicios para la mejora de salud de una comunidad.                                               |  |
| 2                                           | Explicar las formas de relaciones que afectan la salud en una comunidad (por ejemplo, relaciones entre departamentos de salud, hospitales, centros de salud, proveedores de atención primaria, escuelas, organizaciones comunitarias). |  |
| 3                                           | Sugerir relaciones que puedan ser necesarias para mejorar la salud de una comunidad.                                                                                                                                                   |  |
| 4                                           | Establecer relaciones para la mejora de salud en una comunidad (por ejemplo, asociaciones con organizaciones que sirven a la misma población, instituciones académicas o políticos).                                                   |  |
| 5                                           | Mantener relaciones que mejoren la salud en una comunidad.                                                                                                                                                                             |  |
| 6                                           | Establecer acuerdos por escrito (por ejemplo, memorándum en entendimientos, contratos, cartas de aprobación) que describan el objeto y alcance de las alianzas.                                                                        |  |
| 7                                           | Asegurarse que los miembros de la comunidad están comprometidos para mejorar la salud (por ejemplo, desarrollo e implementación de evaluaciones en salud, planes de mejora, retroalimentación sobre programas y servicios).            |  |
| 8                                           | Asegurarse de que la opinión de la comunidad es utilizada para el desarrollo, implementación, evaluación y mejora de políticas, programas y servicios.                                                                                 |  |
| 9                                           | Negociar el uso de activos y recursos (por ejemplo, bibliotecas públicas, hospitales, organizaciones religiosas, instituciones académicas, subsidios federales, programas de becas) para la mejora en salud de una comunidad.          |  |
| 10                                          | Defender las políticas, programas y recursos que mejoren la salud en una comunidad (por ejemplo, uso de evidencia para demostrar la necesidad de un programa o el impacto de un programa).                                             |  |
| 11                                          | Involucrar a la organización en investigación participativa basada en la comunidad.                                                                                                                                                    |  |
| Puntuación                                  |                                                                                                                                                                                                                                        |  |

|                                             |  |
|---------------------------------------------|--|
| <i>Hasta qué punto es usted capaz de...</i> |  |
| Promedio                                    |  |

**Dominio 6. Habilidades en ciencias de la salud pública**

|                                             |                                                                                                                                                                                                                                                                                                                         |
|---------------------------------------------|-------------------------------------------------------------------------------------------------------------------------------------------------------------------------------------------------------------------------------------------------------------------------------------------------------------------------|
| <i>Hasta qué punto es usted capaz de...</i> |                                                                                                                                                                                                                                                                                                                         |
| <b>1</b>                                    | Criticar el fundamento científico del campo en la salud pública.                                                                                                                                                                                                                                                        |
| <b>2</b>                                    | Explicar las lecciones que debemos aprender de los eventos destacados en la historia sobre la salud pública (por ejemplo, erradicación de la viruela, desarrollo de vacunas, control de enfermedades infecciosas, agua potable, higiene y lavado de manos, acceso a la atención médica para personas con discapacidad). |
| <b>3</b>                                    | Asegurar que las ciencias de la salud pública (por ejemplo, bioestadísticas, epidemiología, ciencias de la salud ambiental, administración de servicios, ciencias sociales y del comportamiento e informática) se aplican en los 10 Servicios Esenciales de Salud Pública.                                              |
| <b>4</b>                                    | Aplicar las ciencias de la salud pública en la administración y dirección de la organización.                                                                                                                                                                                                                           |
| <b>5</b>                                    | Sintetizar la evidencia (por ejemplo, resultados de investigación, informes de caso, encuestas comunitarias) procedentes de fuentes impresas y electrónicas (por ejemplo, PubMed, revistas de salud pública, informes de morbilidad y mortalidad, informe mundial de salud) para apoyar decisiones.                     |
| <b>6</b>                                    | Explicar las limitaciones de la evidencia científica (por ejemplo, validez, confiabilidad, tamaño de muestra, parcialidad, generalización).                                                                                                                                                                             |
| <b>7</b>                                    | Asegurar la utilización de evidencia en el desarrollo, implementación, evaluación y mejora de políticas, programas y servicios.                                                                                                                                                                                         |
| <b>8</b>                                    | Asegurarse de la conducta ética en la investigación (por ejemplo, confidencialidad del paciente, protección de los sujetos de investigación).                                                                                                                                                                           |
| <b>9</b>                                    | Contribuir con a la base de evidencias en salud pública (por ejemplo, participando en la investigación, en departamentos académicos de salud, artículos de autoría, revisión de manuscritos, publicación de datos disponibles para los investigadores).                                                                 |
| <b>10</b>                                   | Mantener alianzas que aumenten el uso de evidencia en la práctica de salud pública (por ejemplo, entre organizaciones académicas y la práctica, bibliotecas en ciencias de la salud).                                                                                                                                   |
| Puntuación                                  |                                                                                                                                                                                                                                                                                                                         |
| Promedio                                    |                                                                                                                                                                                                                                                                                                                         |

**Dominio 7. Planificación financiera y habilidades directivas**

|                                             |                                                                                                                                                                                                                   |
|---------------------------------------------|-------------------------------------------------------------------------------------------------------------------------------------------------------------------------------------------------------------------|
| <i>Hasta qué punto es usted capaz de...</i> |                                                                                                                                                                                                                   |
| <b>1</b>                                    | Evaluar las estructuras, funciones y autorizaciones de los programas y organizaciones gubernamentales en salud pública.                                                                                           |
| <b>2</b>                                    | Involucrar a las agencias gubernamentales para abordar las necesidades específicas de la comunidad (por ejemplo, plomo en la vivienda, fluoración del agua, carriles para bicicleta, preparación de emergencias). |
| <b>3</b>                                    | Administrar la implementación de políticas y procedimientos del cuerpo de gobierno o unidad administrativa que supervisa la organización (por                                                                     |

| <i>Hasta qué punto es usted capaz de...</i> |                                                                                                                                                                                                                                                    |  |
|---------------------------------------------|----------------------------------------------------------------------------------------------------------------------------------------------------------------------------------------------------------------------------------------------------|--|
|                                             | ejemplo, el consejo de salud, consejo de directores, consejo de la comunidad).                                                                                                                                                                     |  |
| <b>4</b>                                    | Apoyar en los mecanismos financieros y procedimientos de salud pública, así como de atención y servicios de salud para la población (por ejemplo, honorarios e impuestos).                                                                         |  |
| <b>5</b>                                    | Determinar prioridades para los presupuestos de la organización.                                                                                                                                                                                   |  |
| <b>6</b>                                    | Desarrollar presupuestos organizacionales.                                                                                                                                                                                                         |  |
| <b>7</b>                                    | Defender los presupuestos organizacionales.                                                                                                                                                                                                        |  |
| <b>8</b>                                    | Aprobar las propuestas de financiación (por ejemplo, fundaciones, agencias gubernamentales, corporaciones).                                                                                                                                        |  |
| <b>9</b>                                    | Aprobar los contratos y otros acuerdos para programas y servicios.                                                                                                                                                                                 |  |
| <b>10</b>                                   | Asegurar el uso de análisis financiero en la toma de decisiones sobre políticas, programas y servicios (por ejemplo, costo-efectivo, costo-beneficio, análisis costo-utilidad, retorno de la inversión).                                           |  |
| <b>11</b>                                   | Asegurar que los programas se gestionan dentro de los presupuestos actuales proyectados y niveles de competencia del personal (por ejemplo, mantenimiento del programa cuando fondos y personal se cortan, reclutamiento y retención de personal). |  |
| <b>12</b>                                   | Establecer equipos con el propósito de cumplir con los programas y objetivos de la organización (por ejemplo, considerando los sectores, habilidades, experiencias y perspectivas; determinar el alcance del trabajo y línea del tiempo).          |  |
| <b>13</b>                                   | Motivar al personal con el propósito de cumplir con los programas y objetivos de la organización (por ejemplo, participación en equipos, intercambio de ideas, respetando los diferentes puntos de vista).                                         |  |
| <b>14</b>                                   | Supervisar el uso de resultados, de las evaluaciones para la mejora de programas y desempeño organizacional.                                                                                                                                       |  |
| <b>15</b>                                   | Establecer sistemas de gestión de actuación (por ejemplo, liderazgo visible, estándares de desempeño, medición del desempeño, informes de progreso, mejora de la calidad).                                                                         |  |
| <b>16</b>                                   | Utilizar los sistemas de gestión de rendimiento y mejora de la organización (por ejemplo, logro de objetivos y metas, aumentar la eficiencia, mejorar los procesos, acreditaciones).                                                               |  |
|                                             | Puntuación                                                                                                                                                                                                                                         |  |
|                                             | Promedio                                                                                                                                                                                                                                           |  |

#### **Dominio 8. Habilidades de liderazgo y pensamiento sistémico**

| <i>Hasta qué punto es usted capaz de...</i> |                                                                                                                                                                         |  |
|---------------------------------------------|-------------------------------------------------------------------------------------------------------------------------------------------------------------------------|--|
| <b>1</b>                                    | Incorporar las normas éticas en la práctica (por ejemplo, código de ética y salud pública) en todas las interacciones con los individuos, organizaciones y comunidades. |  |
| <b>2</b>                                    | Interactuar con el sistema organizacional que influye en la salud de las poblaciones, a nivel local, nacional y mundial.                                                |  |
| <b>3</b>                                    | Crear oportunidades para que las organizaciones trabajen en conjunto o individualmente para la mejora de salud de la comunidad.                                         |  |

|            |                                                                                                                                                                                                                                                                           |  |
|------------|---------------------------------------------------------------------------------------------------------------------------------------------------------------------------------------------------------------------------------------------------------------------------|--|
| 4          | Colaborar con las personas y organizaciones en el desarrollo de una visión para una comunidad saludable (por ejemplo, énfasis en la prevención, equidad en salud, excelencia e innovación).                                                                               |  |
| 5          | Tomar medidas para minimizar las barreras internas y externas que puedan afectar el funcionamiento de las 11 funciones esenciales de salud pública (por ejemplo, utilizando análisis de causa raíz y herramientas para la mejora de la calidad, resolución de problemas). |  |
| 6          | Asegurar la disponibilidad de oportunidades de desarrollo profesional para la organización (por ejemplo, evaluación de competencias, planificación de desarrollo laboral, formación, tutoría, pares de asesoramiento, coaching).                                          |  |
| 7          | Asegurar la utilización de oportunidades en el desarrollo profesional en toda la organización.                                                                                                                                                                            |  |
| 8          | Asegurar la gestión del cambio organizacional (por ejemplo, reorientación de un programa u organización, minimizando la desorganización, maximizando la eficacia).                                                                                                        |  |
| 9          | Asegurar la mejora continua de las personas, programas y desempeño organizacional (por ejemplo, tutoría, monitoreo de los progresos, ajuste de programas para mejora).                                                                                                    |  |
| 10         | Abogar por el papel de la salud pública en la prestación de servicios de salud a la población.                                                                                                                                                                            |  |
| Puntuación |                                                                                                                                                                                                                                                                           |  |
| Promedio   |                                                                                                                                                                                                                                                                           |  |

### Sus resultados

Escriba su puntuación y promedio en la fila correspondiente.

| Dominio/Competencia                                               | Ítems | Puntuación | Promedio |
|-------------------------------------------------------------------|-------|------------|----------|
| D1. Habilidades de Evaluación/Analíticas                          | 15    |            |          |
| D2. Política de desarrollo/ Programa de Habilidades de Planeación | 14    |            |          |
| D3. Habilidades de Comunicación                                   | 8     |            |          |
| D4. Habilidades de Competencia Cultural                           | 8     |            |          |
| D5. Dimensiones de la Comunidad para la Práctica de Habilidades   | 11    |            |          |
| D6. Habilidades en Ciencias de la Salud Pública                   | 10    |            |          |
| D7. Planificación Financiera y Habilidades Directivas             | 16    |            |          |
| D8. Habilidades de liderazgo y Pensamiento Sistémico              | 10    |            |          |
| Competencia para la práctica de la salud pública                  | 92    |            |          |

### Interpretación de resultados

Con base en los promedios en la sección “sus resultados”, identifique los puntos fuertes en su práctica y las áreas de oportunidad. Los promedios entre 1 y 2 lo posicionan en nivel “no competente”, entre 2 y 3 en nivel “consistente”, entre 3 y 4 en “conocedor”, y un promedio de 4 lo ubica en nivel “competente”. Asimismo, estos promedios determinan la prioridad que le deberá otorgar a cada área o dominio de oportunidad.
